# Supplementary material for: Genetic Ablation of the MET Oncogene Defines a Crucial Role of the HGF/MET Axis in Cell-Autonomous Functions Driving Tumor Dissemination
Source: MDPI journal article supplement (doi:10.3390/cancers15102742), 2023-05-13
Supplement: s1 [file s1]

Western blot Figure 1B

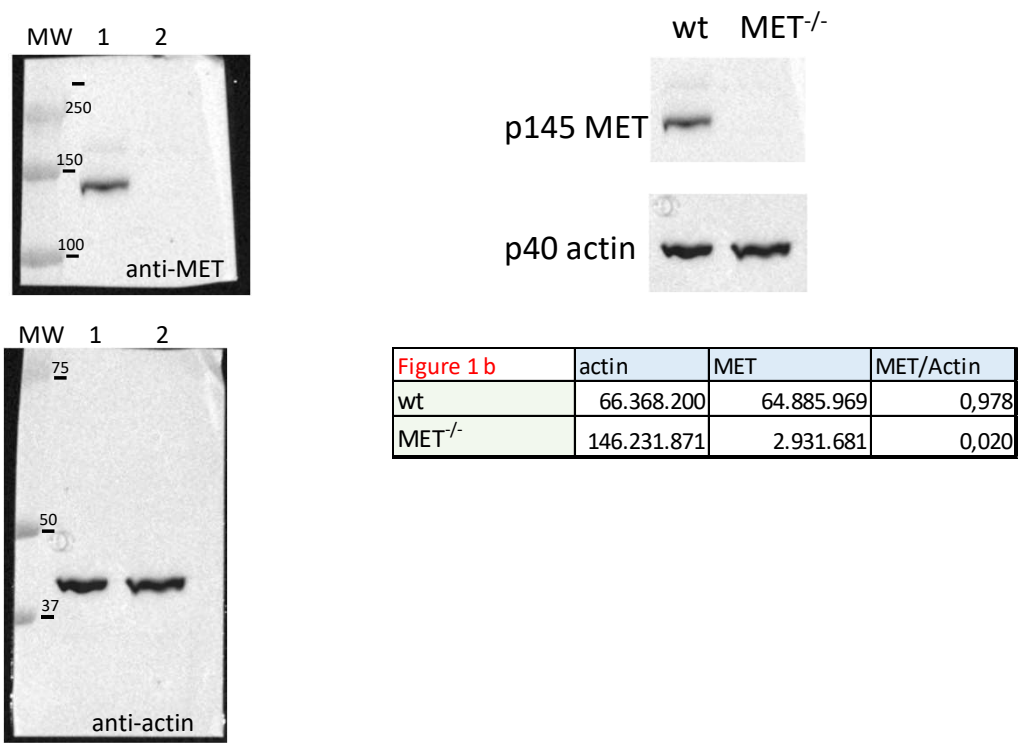

MW: Molecular Weight (Kda)  
1: A549 wild type  
2: A549 MET<sup>-/-</sup>

Western blot Figure 1C

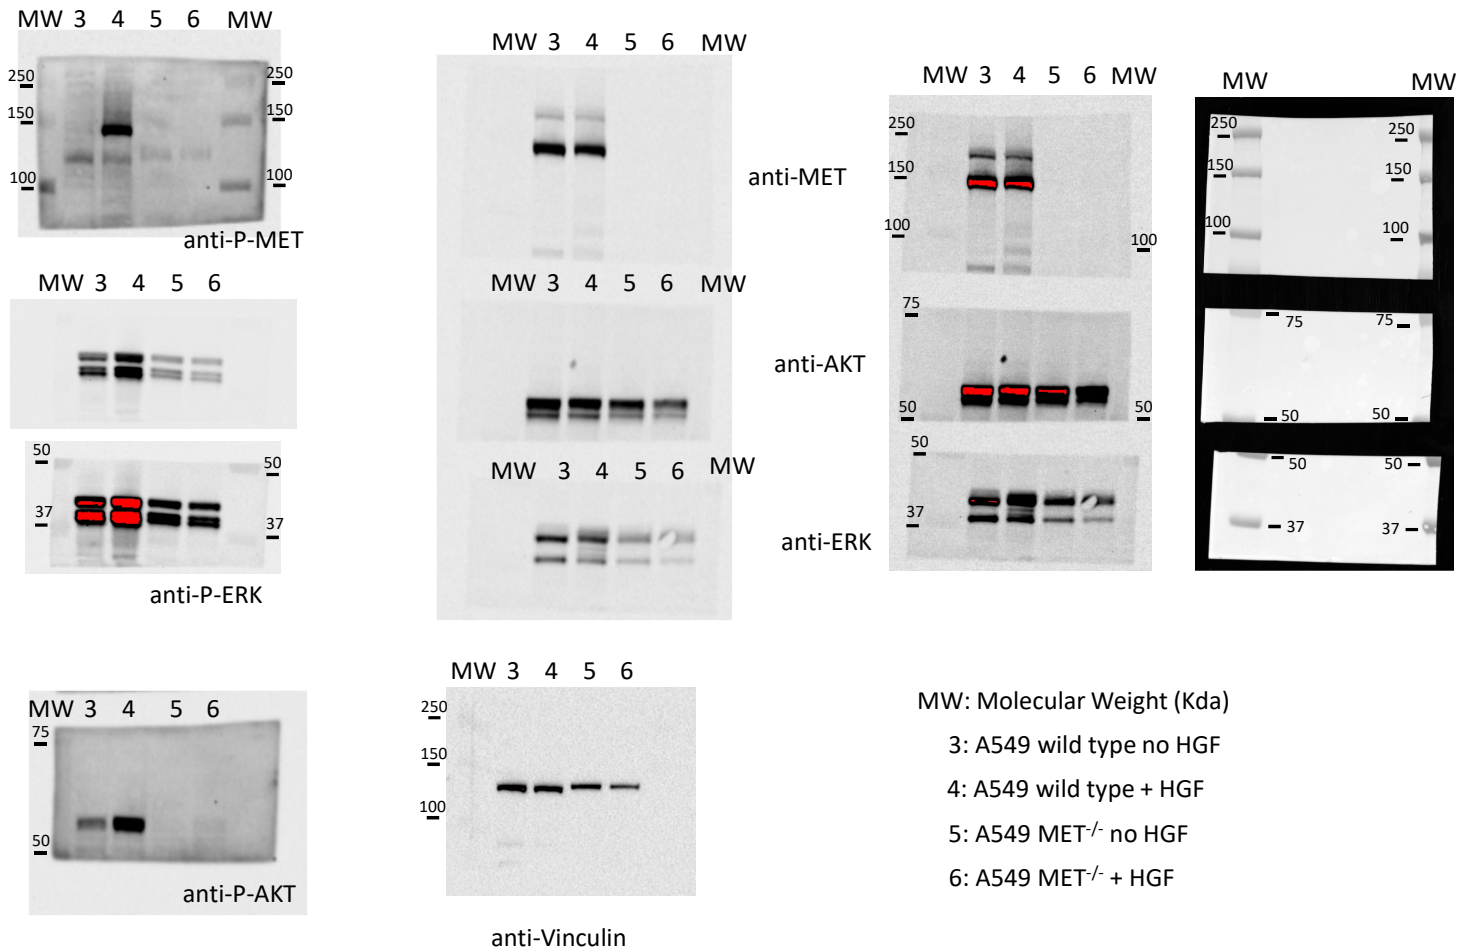

Western blot Figure 1C

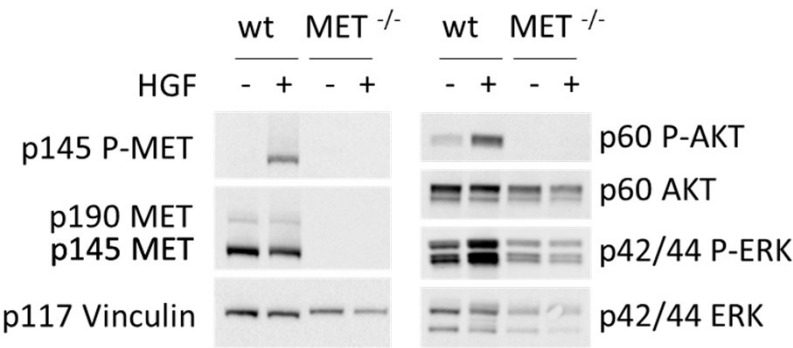

|                          |            |            |            |            |            |            |            |
|--------------------------|------------|------------|------------|------------|------------|------------|------------|
| Figure 1 c               | vinculin   | pMET       | MET        | pERK       | ERK        | pAKT       | AKT        |
| wt                       | 30.258.530 | 3.127.196  | 39.208.510 | 24.128.731 | 31.406.924 | 10.896.196 | 34.977.731 |
| wt + HGF                 | 24.899.560 | 36.842.773 | 31.735.167 | 38.627.711 | 31.846.510 | 40.961.652 | 32.034.317 |
| MET <sup>-/-</sup>       | 17.570.267 | 912.510    | 0          | 12.376.518 | 14.664.095 | 1.165.660  | 23.578.246 |
| MET <sup>-/-</sup> + HGF | 9.853.024  | 377.163    | 0          | 7.881.569  | 8.501.217  | 1.165.660  | 15.867.811 |

|                          |           |          |           |          |           |          |
|--------------------------|-----------|----------|-----------|----------|-----------|----------|
| Figure 1 c               | pMET/Vinc | MET/Vinc | pERK/Vinc | ERK/Vinc | pAKT/Vinc | AKT/Vinc |
| wt                       | 0,103     | 1,296    | 0,797     | 1,038    | 0,360     | 1,156    |
| wt + HGF                 | 1,480     | 1,275    | 1,551     | 1,279    | 1,645     | 1,287    |
| MET <sup>-/-</sup>       | 0,052     | 0,000    | 0,704     | 0,835    | 0,066     | 1,342    |
| MET <sup>-/-</sup> + HGF | 0,038     | 0,000    | 0,800     | 0,863    | 0,118     | 1,610    |

|                          |          |          |          |
|--------------------------|----------|----------|----------|
| Figure 1 c               | pMET/MET | pERK/ERK | pAKT/AKT |
| wt                       | 0,080    | 0,768    | 0,312    |
| wt + HGF                 | 1,161    | 1,213    | 1,279    |
| MET <sup>-/-</sup>       | #DIV/0!  | 0,844    | 0,049    |
| MET <sup>-/-</sup> + HGF | #DIV/0!  | 0,927    | 0,073    |

Western Blot Figure 5B

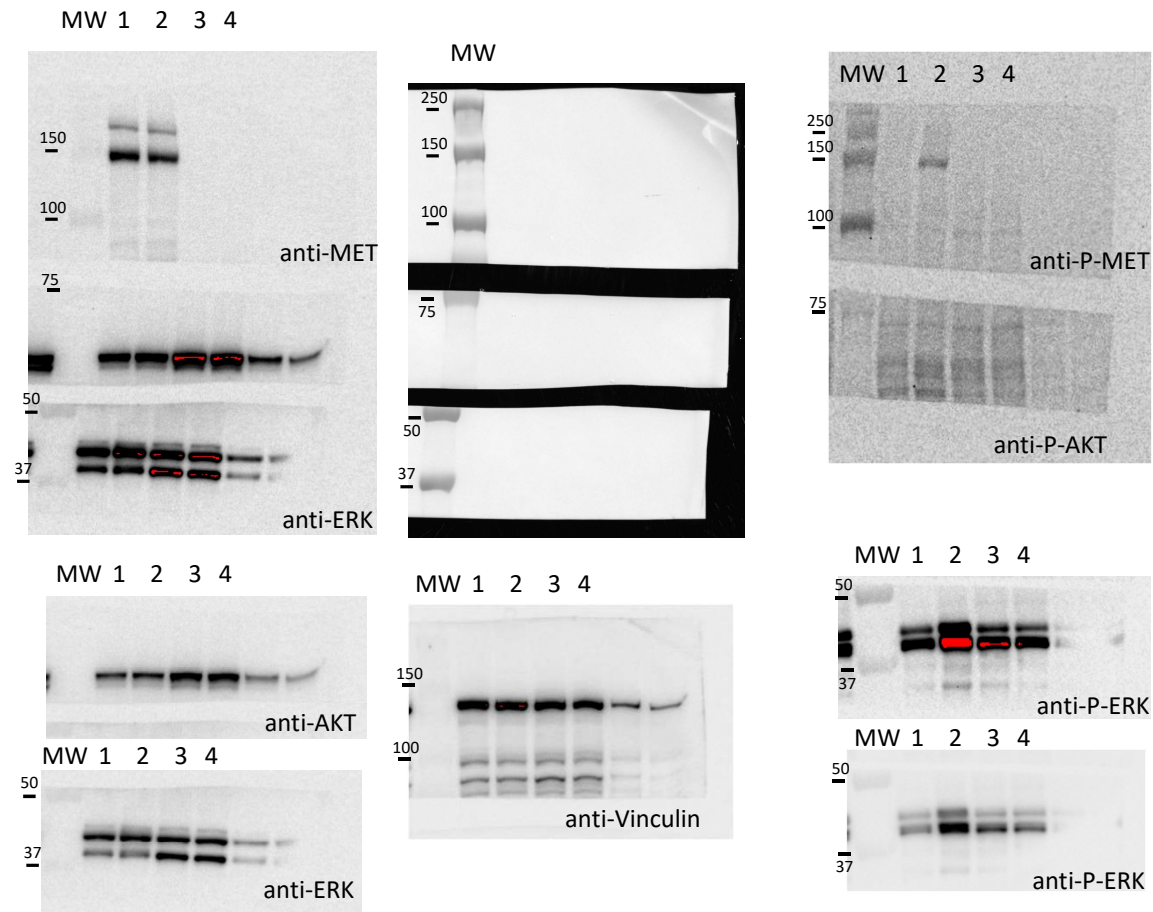

MW: Molecular Weight (Kda)

1: Capan-I wild type no HGF  
2: Capan-I wild type + HGF

3: Capan-I MET<sup>-/-</sup> no HGF  
4: Capan-I MET<sup>-/-</sup> + HGF

# Western Blot Figure 5B

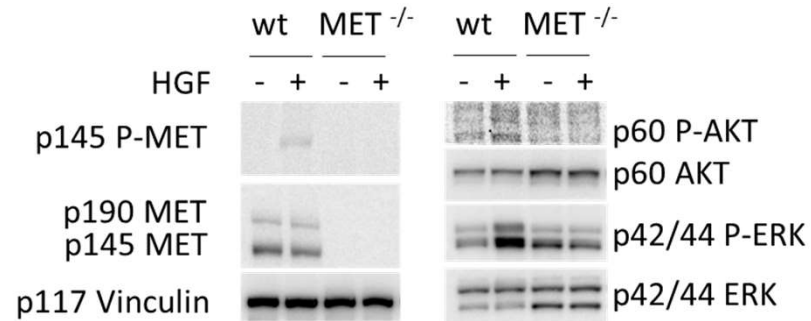

| Figure 4 b               | Vinculin   | pMET       | MET        | pAKT       | AKT        | pERK       | ERK        |
|--------------------------|------------|------------|------------|------------|------------|------------|------------|
| wt                       | 40.803.468 | 5.197.719  | 38.570.066 | 9.973.104  | 7.607.640  | 14.087.539 | 9.530.276  |
| wt + HGF                 | 42.103.317 | 17.134.468 | 33.836.894 | 15.007.640 | 9.454.154  | 40.519.631 | 11.564.104 |
| MET <sup>-/-</sup>       | 41.045.660 | 0          | 1.403.589  | 9.325.640  | 16.568.225 | 22.517.974 | 15.031.468 |
| MET <sup>-/-</sup> + HGF | 87.629.453 | 1          | 1.403.589  | 7.666.933  | 14.305.569 | 17.510.196 | 14.214.518 |

| Figure 4 b               | pMET/Vinc | MET/Vinc | pAKT/Vinc | AKT/Vinc | pERK/Vinc | ERK/Vinc |
|--------------------------|-----------|----------|-----------|----------|-----------|----------|
| wt                       | 0,127     | 0,945    | 0,244     | 0,186    | 0,345     | 0,234    |
| wt + HGF                 | 0,407     | 0,804    | 0,356     | 0,225    | 0,962     | 0,275    |
| MET <sup>-/-</sup>       | 0,000     | 0,034    | 0,227     | 0,404    | 0,549     | 0,366    |
| MET <sup>-/-</sup> + HGF | 0,000     | 0,016    | 0,087     | 0,163    | 0,200     | 0,162    |

| Figure 4 b               | pMET/MET | pAKT/AKT | pERK/ERK |
|--------------------------|----------|----------|----------|
| wt                       | 0,135    | 1,311    | 1,478    |
| wt + HGF                 | 0,506    | 1,587    | 3,504    |
| MET <sup>-/-</sup>       | 0,000    | 0,563    | 1,498    |
| MET <sup>-/-</sup> + HGF | 0,000    | 0,536    | 1,232    |

Western Blot Supplementary Figure S8B

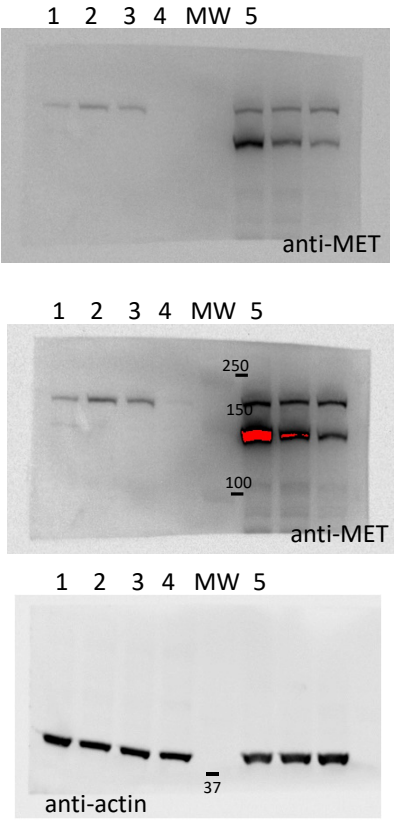

MW: Molecular Weight (Kda)

- 1: Capan-I clone 5
- 2: Capan-I clone 8
- 3: Capan-I clone 11
- 4: Capan-I clone 13
- 5: Capan-I wild type

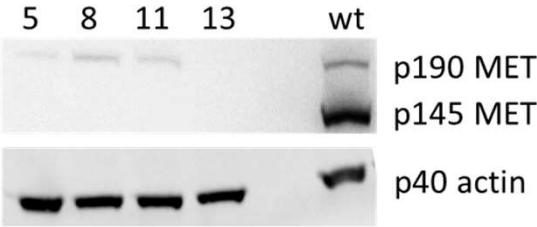

| Suppl. Fig. 3B | MET        | Actin      | MET/Actin |
|----------------|------------|------------|-----------|
| Clone 5        |            | 31.870.539 | 0         |
| Clone 8        |            | 29.446.125 | 0         |
| Clone 11       |            | 29.178.317 | 0         |
| Clone 13       |            | 29.024.439 | 0         |
| WT             | 31.702.681 | 68.976.127 | 0,460     |
